# Supplementary material
Source: PubMed Central journal article supplement (PMC7390656)
Supplement: NIHMS1551416-supplement-1.pdf [file NIHMS1551416-supplement-1.pdf]

380  
381

## Supplemental Tables

### Supplemental Table I.

The American Association for Surgery of Trauma-defined International Classification of Diseases, 9th revision, Clinical Modification Emergency General Surgery Diagnosis Groups and Conditions

| Diagnosis Group              | Conditions                                                                                                                                                                                                                                                                           |
|------------------------------|--------------------------------------------------------------------------------------------------------------------------------------------------------------------------------------------------------------------------------------------------------------------------------------|
| Resuscitation                | acute respiratory failure, shock                                                                                                                                                                                                                                                     |
| General abdominal conditions | abdominal pain, abdominal mass, peritonitis                                                                                                                                                                                                                                          |
| Intestinal obstruction       | adhesion, incarcerated hernia, cancer, volvulus, intussusception                                                                                                                                                                                                                     |
| Upper gastrointestinal tract | upper gastrointestinal bleed, peptic ulcer disease, fistula, gastrostomy, small intestinal cancer, ileus, Meckel's, bowel perforation, appendix                                                                                                                                      |
| Hepatic-pancreatic-biliary   | gallstones and related diseases, pancreatitis, hepatic abscess                                                                                                                                                                                                                       |
| Colorectal                   | lower gastrointestinal bleed, diverticular disease, inflammatory bowel disease, colorectal cancer, colitis, colonic perforation, megacolon, regional enteritis, colostomy/ ileostomy, hemorrhoid, perianal and perirectal fistula and infection, anorectal stenosis, rectal prolapse |
| Hernias                      | inguinal, femoral, umbilical, incisional, ventral, diaphragmatic                                                                                                                                                                                                                     |
| Soft tissue                  | cellulitis, abscess, fasciitis, wound care, pressure ulcer, compartment syndrome                                                                                                                                                                                                     |
| Vascular                     | ruptured aneurysm, acute intestinal ischemia, acute peripheral ischemia, phlebitis                                                                                                                                                                                                   |
| Cardiothoracic               | cardiac tamponade, empyema, pneumothorax, esophageal perforation                                                                                                                                                                                                                     |
| Other                        | tracheostomy, foreign body, bladder rupture                                                                                                                                                                                                                                          |

382  
383

**Supplemental Table II.**

International Classification of Diseases, 9th revision, Clinical Modification Diagnosis Codes for In-hospital Complications

---

|                                                                                     |                                                                                                                                                                                                                                                                                                                                                       |
|-------------------------------------------------------------------------------------|-------------------------------------------------------------------------------------------------------------------------------------------------------------------------------------------------------------------------------------------------------------------------------------------------------------------------------------------------------|
| Urinary                                                                             |                                                                                                                                                                                                                                                                                                                                                       |
| Acute Renal Failure                                                                 | 584                                                                                                                                                                                                                                                                                                                                                   |
| Postoperative urinary retention or urinary tract infection                          | 997.5                                                                                                                                                                                                                                                                                                                                                 |
| Acute urinary tract infection                                                       | 996.64, 590.10-1, 590.80                                                                                                                                                                                                                                                                                                                              |
| Mechanical Wound                                                                    |                                                                                                                                                                                                                                                                                                                                                       |
| Delayed wound healing                                                               | 998.83                                                                                                                                                                                                                                                                                                                                                |
| Postoperative hematoma                                                              | 998.12                                                                                                                                                                                                                                                                                                                                                |
| Postoperative seroma (non-infected)                                                 | 998.13                                                                                                                                                                                                                                                                                                                                                |
| Disruption of operative wound                                                       | 998.30-2                                                                                                                                                                                                                                                                                                                                              |
| Persistent postoperative fistula                                                    | 998.6                                                                                                                                                                                                                                                                                                                                                 |
| Reopening of a laparotomy/reclosure of a postoperative disruption of abdominal wall | 54.12, 54.61                                                                                                                                                                                                                                                                                                                                          |
| Infections                                                                          |                                                                                                                                                                                                                                                                                                                                                       |
| Post-operative infection/surgical site infection                                    | 958.3, 998.50-1, 998.59                                                                                                                                                                                                                                                                                                                               |
| <i>Clostridium difficile</i> colitis                                                | 008.45                                                                                                                                                                                                                                                                                                                                                |
| Bacterial meningitis                                                                | 320.0-3, 320.7-8, 320.80-2, 320.89, 320.9                                                                                                                                                                                                                                                                                                             |
| Sepsis/septicemia                                                                   | 038.0-4, 038.10-2, 038.19, 038.40-4, 038.49, 038.8-9, 995.91-2                                                                                                                                                                                                                                                                                        |
| Acute lymphadenitis                                                                 | 683                                                                                                                                                                                                                                                                                                                                                   |
| Catheter associated infection                                                       | 999.31                                                                                                                                                                                                                                                                                                                                                |
| Pulmonary                                                                           |                                                                                                                                                                                                                                                                                                                                                       |
| Pulmonary failure/pulmonary edema                                                   | 518.81-2, 518.4-5, 518.8                                                                                                                                                                                                                                                                                                                              |
| Pneumonia                                                                           | 481, 482.0-4, 482.30-2, 482.39, 482.40-2, 482.49, 482.8-9, 482.81-4, 482.89, 483, 484, 485, 507.0, 997.31, 510.0, 510.9                                                                                                                                                                                                                               |
| Mediastinal infections                                                              | 513.1, 519.2                                                                                                                                                                                                                                                                                                                                          |
| Post-pulmonary complications                                                        | 997.32, 997.39, 512.1-2, 997.3                                                                                                                                                                                                                                                                                                                        |
| Gastrointestinal Tract                                                              |                                                                                                                                                                                                                                                                                                                                                       |
| Postoperative bowel obstruction/ileus or other digestive system complications       | 997.4, 997.49                                                                                                                                                                                                                                                                                                                                         |
| Gastrointestinal bleeding                                                           | 530.82, 531.0, 531.00-1, 531.2, 531.20-1, 531.4, 531.40-1, 531.6, 531.60-1, 532.0, 532.00-1, 532.2, 532.20-1, 532.4, 532.40-1, 532.6, 532.60-1, 533.0, 533.00-1, 533.2, 533.20-1, 533.4, 533.40-1, 533.6, 533.60-1, 534.0, 534.00-1, 534.2, 534.20-1, 534.4, 534.40-1, 534.6, 534.60-1, 535.01, 535.11, 535.21, 535.31, 535.41, 535.51, 535.61, 578.9 |
| Cardiovascular                                                                      |                                                                                                                                                                                                                                                                                                                                                       |

|                                                                                   |                                                                                                                          |
|-----------------------------------------------------------------------------------|--------------------------------------------------------------------------------------------------------------------------|
| Deep vein thrombosis/pulmonary embolism                                           | 415.1, 415.11, 451.11, 451.19,<br>451.2, 451.81, 453.8, 997.79,<br>453.4, 453.40-2                                       |
| Postoperative stroke                                                              | 997.02                                                                                                                   |
| Postoperative phlebitis or thrombophlebitis                                       | 997.2                                                                                                                    |
| Cardiac arrest/insufficiency during or resulting from a procedure                 | 997.1                                                                                                                    |
| Myocardial infarction                                                             | 410.0-9, 410.00-1, 410.10,<br>410.11, 410.20-1, 410.3-1,<br>410.40-1, 410.5-1, 410.60-1,<br>410.70-1, 410.80-1, 410.90-1 |
| Procedural                                                                        |                                                                                                                          |
| Accidental puncture or laceration                                                 | 998.2                                                                                                                    |
| Retained foreign body                                                             | 998.4                                                                                                                    |
| Bleeding/hemorrhage/shock                                                         | 998.11, 998.0-1, 995.4                                                                                                   |
| Air embolism                                                                      | 999.1                                                                                                                    |
| Other complications of procedure not otherwise specified (includes post-op fever) | 998.89, 998.9                                                                                                            |
| Systemic                                                                          |                                                                                                                          |
| Transfusion reaction                                                              | 999.6-8, 999.60-3, 999.69, 999.7,<br>999.70-9, 999.80-1, 999.83-5,<br>999.88-9                                           |
| iatrogenic shock/hypotension                                                      | 485.2, 995.4                                                                                                             |

---

385

386

**Supplementary Table III.**

Complications in Encounters of Emergency General Surgery Patients by Transfer Status in the Nationwide Inpatient Sample (2008-2011)

| Complications, % (n)                                                                | Transferred<br>(n= 274,145) | Directly Admitted<br>(n= 10,456,100) | P value |
|-------------------------------------------------------------------------------------|-----------------------------|--------------------------------------|---------|
| Urinary Tract                                                                       | 13.7 (37,601)               | 8.1 (849,883)                        | <0.0001 |
| Acute Renal Failure                                                                 | 13.3 (36,514)               | 7.7 (809,743)                        | <0.0001 |
| Postoperative urinary retention or urinary tract infection                          | 0.2 (592)                   | 0.2 (19,446)                         | 0.1385  |
| Acute urinary tract infection                                                       | 0.4 (1,038)                 | 0.3 (30,680)                         | 0.0003  |
| Mechanical Wound                                                                    | 1.6 (4,261)                 | 0.6 (61,826)                         | <0.0001 |
| Delayed wound healing                                                               | 0.2 (457)                   | 0.1 (6,862)                          | <0.0001 |
| Postoperative hematoma                                                              | 0.6 (1,515)                 | 0.2 (21,685)                         | <0.0001 |
| Postoperative seroma (non-infected)                                                 | 0.1 (390)                   | 0.1 (7,701)                          | <0.0001 |
| Disruption of operative wound                                                       | 0.6 (1,545)                 | 0.2 (21,466)                         | <0.0001 |
| Persistent postoperative fistula                                                    | 0.2 (571)                   | 0.1 (6,312)                          | <0.0001 |
| Reopening of a laparotomy/reclosure of a postoperative disruption of abdominal wall | 0                           | 0.001 (110)                          |         |
| Infections                                                                          | 9.9 (27,047)                | 6.2 (647,808)                        | <0.0001 |
| Post-operative infection/surgical site infection                                    | 1.2 (3,289)                 | 0.6 (60,300)                         | <0.0001 |
| <i>Clostridium difficile</i> colitis                                                | 4.0 (10,961)                | 4.0 (413,882)                        | 0.7502  |
| Bacterial meningitis                                                                | 0.007 (*)                   | 0.002 (39)                           | 0.0056  |
| Sepsis/septicemia                                                                   | 5.2 (14,341)                | 2.0 (205,837)                        | <0.0001 |
| Acute lymphadenitis                                                                 | 0.01 (33)                   | 0.02 (2,187)                         | 0.1370  |
| Catheter associated infection                                                       | 0.5 (1,453)                 | 0.1 (13,766)                         | <0.0001 |
| Pulmonary                                                                           | 13.3 (36,391)               | 5.1 (532,680)                        | <0.0001 |
| Pulmonary failure/pulmonary edema                                                   | 10.4 (28,525)               | 3.9 (403,765)                        | <0.0001 |
| Pneumonia                                                                           | 4.5 (12,408)                | 1.4 (144,355)                        | <0.0001 |
| Mediastinal infections                                                              | 0.1 (385)                   | 0.01 (1,019)                         | <0.0001 |
| Post-pulmonary complications                                                        | 1.2 (3,191)                 | 0.7 (70,247)                         | <0.0001 |
| Gastrointestinal Tract                                                              | 12.9 (35,465)               | 10.9 (1,136,753)                     | <0.0001 |
| Postoperative bowel obstruction/ileus or other digestive system complications       | 2.3 (6,377)                 | 1.6 (170,035)                        | <0.0001 |
| Gastrointestinal bleed                                                              | 10.7 (29,359)               | 9.3 (972,315)                        | <0.0001 |
| Cardiovascular                                                                      | 5.5 (15,027)                | 2.3 (235,654)                        | <0.0001 |
| Deep vein thrombosis/pulmonary embolism                                             | 3.1 (8,546)                 | 1.3 (135,544)                        | <0.0001 |
| Postoperative stroke                                                                | 0.04 (113)                  | 0.01 (1,371)                         | <0.0001 |
| Postoperative phlebitis or thrombophlebitis                                         | 0.1 (297)                   | 0.03 (3,259)                         | <0.0001 |
| Cardiac arrest/insufficiency                                                        | 0.6 (1,581)                 | 0.3 (31,294)                         | <0.0001 |

|                                                                                          |                |                  |         |
|------------------------------------------------------------------------------------------|----------------|------------------|---------|
| during or resulting from procedure                                                       |                |                  |         |
| Myocardial infarction                                                                    | 2.0 (5,481)    | 0.7 (76,596)     | <0.0001 |
| Procedural                                                                               | 2.3 (6,432)    | 1.1 (112,300)    | <0.0001 |
| Accidental puncture or laceration                                                        | 0.8 (2,218)    | 0.4 (42,624)     | <0.0001 |
| Retained foreign body                                                                    | 0.02 (44)      | 0.008 (791)      | 0.0003  |
| Bleeding/hemorrhage/shock                                                                | 1.5 (4,084)    | 0.6 (64,458)     | <0.0001 |
| Air embolism                                                                             | 0              | 0.0002 (26)      |         |
| Other complications of procedure not otherwise specified (includes post-operative fever) | 0.1 (330)      | 0.08 (8,176)     | 0.0005  |
| Systemic                                                                                 | 0.08 (231)     | 0.05 (5,504)     | 0.0023  |
| Transfusion reaction                                                                     | 0.08 (227)     | 0.05 (5,433)     | 0.003   |
| Iatrogenic shock/hypotension                                                             | 0.002 (*)      | 0.0007 (71)      | 0.3869  |
| None                                                                                     | 61.2 (167,833) | 73.9 (7,731,883) | <0.0001 |

388 \*Number suppressed due to small cell size

389

**Supplemental Table IV.**

Factors Associated with Outcomes of Encounters of Emergency General Surgery Patients in the Nationwide Inpatient Sample (2008-2011)

| Patient-Level Characteristics                                   | Mortality<br>Adjusted Odds Ratio (95% CI) | Morbidity<br>Adjusted Odds Ratio (95% CI) | Length of Stay (log(days))<br>Estimated Regression Coefficient (x100) (SE) | Cost (log(\$))<br>Estimated Regression Coefficient (x100) (SE) |
|-----------------------------------------------------------------|-------------------------------------------|-------------------------------------------|----------------------------------------------------------------------------|----------------------------------------------------------------|
| <b>Transfer status</b>                                          |                                           |                                           |                                                                            |                                                                |
| Directly admitted                                               | 1 (Reference)                             | 1 (Reference)                             | 0 (Reference)                                                              | 0 (Reference)                                                  |
| Transferred                                                     | 1.7 (1.6-1.8)*                            | 1.4 (1.3-1.4)*                            | 15.8 (0.9)*                                                                | 8.2 (1.9)*                                                     |
| <b>Gender</b>                                                   |                                           |                                           |                                                                            |                                                                |
| Female                                                          | 1 (Reference)                             | 1 (Reference)                             | 0 (Reference)                                                              | 0 (Reference)                                                  |
| Male                                                            | 1.1 (1.1-1.1)*                            | 1.2 (1.2-1.2)*                            | 2.7 (0.0)*                                                                 | 0.7 (652)                                                      |
| <b>Age</b>                                                      |                                           |                                           |                                                                            |                                                                |
|                                                                 | 1.0 (1.0-1.0)*                            | 1.0 (1.0-1.0)*                            | 0.4 (0.0)*                                                                 | 0.2 (0.0)*                                                     |
| <b>Race</b>                                                     |                                           |                                           |                                                                            |                                                                |
| White                                                           | 1 (Reference)                             | 1 (Reference)                             | 0 (Reference)                                                              | 0 (Reference)                                                  |
| Black                                                           | 1.0 (0.9-1.0) <sup>‡</sup>                | 1.0 (1.0-1.1) <sup>‡</sup>                | 3.5 (0.4)*                                                                 | 5.7 (0.8)*                                                     |
| Hispanic                                                        | 0.9 (0.9-1.0) <sup>‡</sup>                | 0.8 (0.8-0.9)*                            | 0.1 (0.5)                                                                  | 3.7 (1.1) <sup>†</sup>                                         |
| Other                                                           | 1.0 (0.9-1.1)                             | 0.9 (0.9-1.0)*                            | -1.7 (0.7) <sup>†</sup>                                                    | 3.0 (1.1) <sup>†</sup>                                         |
| Missing                                                         | 1.0 (1.0-1.1)                             | 1.0 (1.0-1.1)                             | -1.5 (0.7)                                                                 | -3.6 (1.5) <sup>‡</sup>                                        |
| <b>Primary Insurance</b>                                        |                                           |                                           |                                                                            |                                                                |
| Private insurance                                               | 1 (Reference)                             | 1 (Reference)                             | 0 (Reference)                                                              | 0 (Reference)                                                  |
| Medicare                                                        | 0.9 (0.9-1.0) <sup>†</sup>                | 1.2 (1.2-1.2)*                            | 6.4 (0.2)*                                                                 | 5.1 (0.3)*                                                     |
| Medicaid                                                        | 1.3 (1.2-1.4)*                            | 1.2 (1.2-1.2)*                            | 8.1 (0.3)*                                                                 | 6.4 (0.6)*                                                     |
| Other                                                           | 1.3 (1.2-1.4)*                            | 1.0 (1.0-1.0)                             | 0.8 (0.3) <sup>†</sup>                                                     | 0.1 (0.6)                                                      |
| <b>Median household income national quartile</b>                |                                           |                                           |                                                                            |                                                                |
| 0-25 <sup>th</sup>                                              | 1 (Reference)                             | 1 (Reference)                             | 0 (Reference)                                                              | 0 (Reference)                                                  |
| 26 <sup>th</sup> -50 <sup>th</sup>                              | 1.0 (0.9-1.0)                             | 1.0 (1.0-1.0)                             | -1.1 (0.3) <sup>†</sup>                                                    | 2.7 (0.6)*                                                     |
| 51 <sup>st</sup> -75 <sup>th</sup>                              | 0.9 (0.9-1.0)*                            | 1.0 (1.0-1.0)                             | -2.5 (0.4)*                                                                | 3.9 (0.8)*                                                     |
| 76 <sup>th</sup> -100 <sup>th</sup>                             | 0.9 (0.8-0.9)*                            | 1.0 (1.0-1.0)                             | -4.3 (0.6)*                                                                | 7.3 (1.2)*                                                     |
| <b>Charlson Comorbidity Index</b>                               |                                           |                                           |                                                                            |                                                                |
| 0                                                               | 1 (Reference)                             | 1 (Reference)                             | 0 (Reference)                                                              | 0 (Reference)                                                  |
| 1                                                               | 1.4 (1.3-1.4)*                            | 1.4 (1.4-1.5)*                            | 8.4 (0.1)*                                                                 | 10.3 (0.2)*                                                    |
| 2                                                               | 1.8 (1.8-1.9)*                            | 1.9 (1.9-2.0)*                            | 14.0 (0.2)*                                                                | 17.7 (0.3)*                                                    |
| 3 or more                                                       | 2.8 (2.7-2.9)*                            | 2.6 (2.5-2.6)*                            | 20.2 (0.3)*                                                                | 26.2 (0.4)*                                                    |
| <b>EGS Diagnosis Group (Reference is no for each diagnosis)</b> |                                           |                                           |                                                                            |                                                                |
| Resuscitation                                                   | 6.0 (4.6-8.0)*                            | 2.9 (2.3-3.6)*                            | 30.3 (2.6)*                                                                | 33.3 (3.1)*                                                    |
| General                                                         |                                           |                                           |                                                                            |                                                                |
| abdominal conditions                                            | 1.0 (0.8-1.2)                             | 0.2 (0.2-0.2)*                            | 11.6 (1.6)*                                                                | 11.1 (1.5)*                                                    |
| Intestinal obstruction                                          | 1.2 (1.0-1.5)                             | 0.3 (0.3-0.3)*                            | 30.5 (1.5)*                                                                | 12.4 (1.5)*                                                    |
| Upper gastrointestinal tract                                    | 0.7 (0.5-0.8)*                            | 2.5 (2.3-2.8)*                            | 4.5 (1.5) <sup>†</sup>                                                     | 3.2 (1.5)*                                                     |

|                                |                            |                            |                        |                        |
|--------------------------------|----------------------------|----------------------------|------------------------|------------------------|
| Hepatic-pancreatic-biliary     | 1.1 (0.9-1.4)              | 0.3 (0.2-0.3)*             | 37.3 (1.5)*            | 30.0 (1.5)*            |
| Colorectal                     | 0.7 (0.6-0.8) <sup>†</sup> | 0.6 (0.6-0.7)*             | 29.0 (1.5)*            | 13.4 (1.5)*            |
| Hernias                        | 1.0 (0.8-1.2)              | 0.3 (0.3-0.4)*             | 5.2 (1.5) <sup>†</sup> | 8.6 (1.5)*             |
| Soft tissue                    | 0.5 (0.4-0.6)*             | 0.2 (0.2-0.3)*             | 35.8 (1.5)*            | 1.4 (1.6)              |
| Vascular                       | 3.3 (2.6-4.0)*             | 0.5 (0.4-0.5)*             | 33.7 (1.5)*            | 29.0 (1.5)*            |
| Cardiothoracic                 | 1.0 (0.8-1.3)              | 7.6 (6.7-8.8) <sup>‡</sup> | 34.0 (2.1)*            | 31.4 (2.1)*            |
| Procedure Type                 |                            |                            |                        |                        |
| No procedure                   | 1 (Reference)              | 1 (Reference)              | 0 (Reference)          | 0 (Reference)          |
| Colon                          | 1.3 (1.3-1.4)*             | 1.8 (1.7-1.9)*             | 84.5 (0.5)*            | 117.7 (0.6)*           |
| Amputation                     | 1.0 (0.8-1.3)              | 1.7 (1.5-1.8)*             | 65.8 (1.4)*            | 94.4 (1.5)*            |
| Anorectal                      | 0.3 (0.2-0.4)*             | 0.3 (0.3-0.3)*             | -7.1 (0.7)*            | 15.8 (0.8)*            |
| Appendix                       | 0.3 (0.3-0.4)*             | 0.1 (0.1-0.1)*             | -3.9 (0.5)*            | 60.2 (0.7)*            |
| Bladder                        | 1.1 (0.7-1.8)              | 2.0 (1.6-2.4)*             | 80.4 (2.7)*            | 99.2 (2.8)*            |
| Cardiothoracic                 | 0.6 (0.5-0.7)*             | 1.5 (1.3-1.6)*             | 38.5 (1.4)*            | 45.6 (1.6)*            |
| Gallbladder                    | 0.3 (0.3-0.3)*             | 1.1 (1.1-1.1)*             | 1.0 (0.5)              | 51.6 (0.6)*            |
| Ear, nose, and throat          | 1.6 (1.3-1.9)*             | 13.1 (10.9-15.7)*          | 88.9 (2.3)*            | 137.2 (2.4)*           |
| Exploratory laparotomy         | 8.7 (7.6-9.9)*             | 3.0 (2.7-3.3)*             | 75.5 (1.3)*            | 89.2 (1.4)*            |
| Stomach                        | 1.2 (1.1-1.2) <sup>†</sup> | 2.3 (2.2-2.4)*             | 35.6 (0.6)*            | 54.3 (0.7)*            |
| Hernia                         | 0.6 (0.5-0.7)*             | 1.2 (1.2-1.3)*             | 20.6 (0.6)*            | 56.0 (0.8)*            |
| Laparoscopy                    | 2.3 (1.7-3.2)*             | 1.0 (0.9-1.2)              | 38.7 (1.5)*            | 74.8 (1.2)*            |
| Hepatobiliary                  | 0.9 (0.7-1.2)              | 3.4 (3.0-3.8)*             | 64.5 (1.9)*            | 103.3 (2.5)*           |
| Lysis of adhesions             | 0.7 (0.7-0.8)*             | 2.4 (2.3-2.5)*             | 64.1 (0.6)*            | 94.0 (0.6)*            |
| Orthopedic or soft tissue      | 1.0 (0.9-1.1)              | 1.1 (1.1-1.1)*             | 23.3 (0.4)*            | 36.4 (0.5)*            |
| Pancreas                       | 1.3 (1.0-1.7) <sup>†</sup> | 5.2 (4.7-5.7)*             | 111.0 (1.9)*           | 135.1 (2.2)*           |
| Kidney                         | 1.7 (0.4-7.0)              | 3.5 (1.6-7.4) <sup>‡</sup> | 74.7 (10.4)*           | 99.1 (10.3)*           |
| Small bowel                    | 1.2 (1.1-1.3)*             | 4.2 (4.0-4.3)*             | 79.3 (0.5)*            | 108.0 (0.6)*           |
| Vascular                       | 0.9 (0.8-1.0) <sup>†</sup> | 2.5 (2.4-2.6)*             | 38.6 (0.6)*            | 92.9 (0.8)*            |
| Day of the week of admission   |                            |                            |                        |                        |
| Monday-Friday                  | 1 (Reference)              | 1 (Reference)              | 0 (Reference)          | 0 (Reference)          |
| Saturday-Sunday                | 1.0 (1.0-1.1) <sup>†</sup> | 1.0 (1.0-1.0)              | 1.1 (0.1)*             | 1.5 (0.1)*             |
| Complications <sup>^</sup>     |                            |                            |                        |                        |
| None                           | 1 (Reference)              | N/A                        | 0 (Reference)          | 0 (Reference)          |
| 1-2                            | 4.5 (4.4-4.7)*             | N/A                        | 34.1 (0.2)*            | 33.9 (0.2)*            |
| ≥3                             | 36.0 (34.3-37.7)*          | N/A                        | 108.9 (0.6)*           | 123.4 (0.7)*           |
| Hospital-Level Characteristics |                            |                            |                        |                        |
| Total number of discharges     | 1.0 (1.0-1.0) <sup>†</sup> | 1.0 (1.0-1.0)              | 0.0 (0.0)              | 0.0 (0.0) <sup>‡</sup> |
| United States Region           |                            |                            |                        |                        |

|                            |                             |                            |                         |                         |
|----------------------------|-----------------------------|----------------------------|-------------------------|-------------------------|
| Northeast                  | 1 (Reference)               | 1 (Reference)              | 0 (Reference)           | 0 (Reference)           |
| Midwest                    | 0.78 (0.7-0.8)*             | 1.1 (1.0-1.1) <sup>†</sup> | -7.0 (1.0)*             | -6.6 (2.4) <sup>†</sup> |
| South                      | 0.9 (0.8-0.9)*              | 1.1 (1.1-1.2)*             | -2.9 (1.0) <sup>†</sup> | -10.9 (2.5)*            |
| West                       | 0.8 (0.8-0.9)*              | 1.2 (1.1-1.3)*             | -11.2 (1.0)*            | 8.1 (2.6) <sup>‡</sup>  |
| Hospital Control/Ownership |                             |                            |                         |                         |
| Private, nonprofit         | 1 (Reference)               | 1 (Reference)              | 0 (Reference)           | 0 (Reference)           |
| Government, nonfederal     | 1.2 (1.2-1.3)*              | 1.0 (0.9-1.0) <sup>†</sup> | 2.3 (0.8) <sup>†</sup>  | 6.7 (1.9) <sup>†</sup>  |
| Private, invest-own        | 1.0 (0.9-1.1)               | 1.0 (0.9-1.0) <sup>†</sup> | -0.1 (0.7)              | -6.9 (1.4)*             |
| Bed size                   |                             |                            |                         |                         |
| Large                      | 1 (Reference)               | 1 (Reference)              | 0 (Reference)           | 0 (Reference)           |
| Small                      | 1.0 (0.9-1.0)               | 0.9 (0.9-1.0)*             | -7.0 (0.7)*             | 5.5 (1.7) <sup>†</sup>  |
| Medium                     | 1.0 (0.9-1.0)               | 1.0 (0.9-1.0) <sup>‡</sup> | -3.3 (0.7)*             | 3.6 (1.8) <sup>‡</sup>  |
| Hospital location          |                             |                            |                         |                         |
| Urban teaching             | 1 (Reference)               | 1 (Reference)              | 0 (Reference)           | 0 (Reference)           |
| Rural                      | 1.12 (1.1-1.2) <sup>†</sup> | 0.9 (0.8-0.9)*             | -8.5 (0.9)*             | 0.2 (2.2)               |
| Urban, non-teaching        | 0.9 (0.9-1.0) <sup>‡</sup>  | 1.0 (0.9-1.0) <sup>‡</sup> | -1.9 (0.7) <sup>†</sup> | -0.5 (1.8)              |
| Year                       |                             |                            |                         |                         |
| 2011                       | 1 (Reference)               | 1 (Reference)              | 0 (Reference)           | 0 (Reference)           |
| 2010                       | 1.1 (1.0-1.1) <sup>‡</sup>  | 1.0 (1.0-1.0)              | 1.8 (0.5) <sup>†</sup>  | 0.5 (1.2)               |
| 2009                       | 1.2 (1.1-1.2)*              | 1.0 (1.0-1.0)              | 3.2 (0.6)*              | -1.4 (1.2)              |
| 2008                       | 1.3 (1.2-1.4)*              | 0.9 (0.9-1.0)*             | 5.6 (0.5)*              | 0.7 (1.2)               |

\*p<0.0001, <sup>†</sup>p<0.01, <sup>‡</sup>p<.05; ^Number of complications at the level of the individual complication as described in Supplementary Table III

CI: Confidence Interval; SE: Standard Error
